# Supplementary material for: Complement 3a receptor 1 on macrophages and Kupffer cells is not required for the pathogenesis of metabolic dysfunction-associated steatotic liver disease
Source: eLife. 2025 Jan 8;13:RP100708. doi: 10.7554/eLife.100708 (PMC11709426; doi:10.7554/eLife.100708)
Supplement: Figure 1—source data 1. — Source data for Figure 1—figure supplement 1B-D. [file elife-100708-fig1-data1.xlsx]

## Sheet: Figure 1A
Organ	C3AR1 expression (nTPM)
Cerebral cortex	5.7
Spinal cord	13
Thyroid gland	2.3
Adrenal gland	10.3
Lung	18
Esophagus	3.8
Stomach	5.2
Small Intestine	9.4
Colon	7.2
Liver	10.4
Gallbladder	15.6
Pancreas	5.8
Kidney	3.1
Urinary bladder	14.7
Testis	2
Prostate	3.2
Ovary	2.7
Cervix	6.5
Endometrium	3.7
Placenta	21.3
Heart muscle	4.3
Smooth muscle	15
Skeletal muscle	1.3
Adipose tissue	17.3
Skin	1.9
Appendix	39
Spleen	20.9
Lymph node	12.1
Bone marrow	22.6
Thymus	4.7

## Sheet: Figure 1C
Data derived from Suppli et al. 2019 (GSE126848)			Fold expression (relative to healthy control mean)
Sample	Gender	Disease	Cfd	C3ar1
GSM3615293	Male	NAFLD	0.0032579	0.572165
GSM3615294	Male	NAFLD	0.00306709	0.0688739
GSM3615295	Male	NAFLD	0.00900777	0.140999
GSM3615296	Female	NAFLD	0.00872459	0.314711
GSM3615297	Female	NAFLD	0.036766	0.225218
GSM3615298	Male	NAFLD	0.0131139	0.187391
GSM3615299	Male	NAFLD	0.0548422	0.628866
GSM3615300	Female	NAFLD	0.010154	0.304044
GSM3615301	Male	NAFLD	0.00671807	0.38406
GSM3615302	Male	NAFLD	0.0454164	0.148374
GSM3615303	Male	NAFLD	0.0596967	0.157732
GSM3615304	Female	NAFLD	0.0330779	0.189096
GSM3615305	Female	NAFLD	0.123992	0.253093
GSM3615306	Male	NAFLD	0.260659	0.521015
GSM3615307	Female	NAFLD	0.0502844	0.21816
GSM3615308	Male	NASH	0.106866	0.601903
GSM3615309	Female	NASH	0.0231397	0.372046
GSM3615310	Male	NASH	0.00622453	0.254163
GSM3615311	Female	NASH	0.0218654	0.357137
GSM3615312	Male	NASH	0.00322688	0.105432
GSM3615313	Male	NASH	0.0331723	1.14433
GSM3615314	Male	NASH	0.0166603	0.595559
GSM3615315	Male	NASH	0.207597	0.203053
GSM3615316	Male	NASH	0.0979662	0.333347
GSM3615317	Female	NASH	0.338061	0.835052
GSM3615318	Female	NASH	0.260524	0.437351
GSM3615319	Male	NASH	0.402855	0.497224
GSM3615320	Male	NASH	0.271447	0.660983
GSM3615321	Male	NASH	0.271177	0.920301
GSM3615322	Male	NASH	0.321677	0.164195
GSM3615323	Male	NASH	0.100663	0.411182
GSM3615324	Male	Healthy	0.998541	0.574544
GSM3615325	Male	Healthy	1.03293	1.24346
GSM3615326	Male	Healthy	1.57771	1.16257
GSM3615327	Male	Healthy	1.64041	0.843775
GSM3615328	Male	Healthy	0.840096	0.987708
GSM3615329	Male	Healthy	1.4051	1.12371
GSM3615330	Male	Healthy	1.1671	1.19112
GSM3615331	Male	Healthy	0.496169	0.622522
GSM3615332	Male	Healthy	1.60872	0.88977
GSM3615333	Male	Healthy	0.59609	0.930611
GSM3615334	Male	Healthy	0.716711	0.960349
GSM3615335	Male	Healthy	0.585438	0.663759
GSM3615336	Male	Healthy	0.529948	1.04124
GSM3615337	Male	Healthy	0.805036	1.76487
GSM3615338	Male	Obese	2.35375	1.86519
GSM3615339	Male	Obese	1.4786	1.21055
GSM3615340	Male	Obese	1.9809	1.30809
GSM3615341	Male	Obese	1.366	1.28787
GSM3615342	Male	Obese	1.25947	1.13402
GSM3615343	Male	Obese	1.2588	0.978192
GSM3615344	Male	Obese	0.663986	0.788263
GSM3615345	Male	Obese	0.498057	0.810071
GSM3615346	Male	Obese	0.852906	0.966297
GSM3615347	Male	Obese	1.96876	1.95123
GSM3615348	Male	Obese	0.796945	0.843378
GSM3615349	Male	Obese	1.05383	1.55432
	AVG	Healthy	1	1
	AVG	Obese	1.29433	1.22479
	AVG	NAFLD	0.0479185	0.287587
	AVG	NASH	0.155195	0.493329

## Sheet: Figure 1D
Weight curve
Weeks on diet	Male, GAN diet							Avg (g)	SEM		Male, RD							Avg (g)
0	15.6	21.8	19.8	19.2	17.8	18.8	19	18.8571	0.714095		18.2	19	17.1	16.6	19	17.9	15.1	17.5571	0.531331
2	21.3	26.6	23.9	23.3	22.7	24.2	24.9	23.8429	0.634657		21	23	23	20.2	23	21.4	19.7	21.6143	0.531139
4	23.3	29.4	26.2	25	24.5	27.5	27.3	26.1714	0.784891		22.6	24.7	25.5	21.5	24.5	24.4	21.4	23.5143	0.626186
6	26.2	33.6	27.1	26.7	26.7	30.6	30.4	28.7571	1.06119		23.6	25.8	27.6	23.2	26.3	26	23.1	25.0857	0.669907
8	28.1	34.7	29.1	28.2	27.3	33	32.4	30.4	1.09848		24.4	27.3	28.6	23.6	27	26.5	24.3	25.9571	0.705373
10	29.7	36.1	31.2	30.6	27.2	34.3	35.4	32.0714	1.23976		25.2	28.2	30.5	25	27.1	27.9	25	26.9857	0.782982
12	31.2	36.2	32.1	32.5	28.6	37.1	37.3	33.5714	1.26222		26.1	28.7	30.7	24.8	28.2	28.2	26.5	27.6	0.737434
14	32.7	38.2	33.2	33.6	30.6	39.1	39.7	35.3	1.36591		27.1	30	31.8	25.8	28.4	27.6	26.7	28.2	0.784068
16	32.3	38.9	34	34.8	31	39.4	41.2	35.9429	1.47291		27.3	30.2	32	25.2	29.3	27.7	26.4	28.3	0.884792
18	32.1	39.1	31.5	33.2	30.4	39.2	41.9	35.3429	1.73409		27.6	30.4	32.1	25.6	29.4	28	26.8	28.5571	0.841161
20	32.6	39.2	33	35.2	29.9	39.5	40.1	35.6429	1.51828		28	31.5	33.7	27.1	29.9	28.4	27.3	29.4143	0.923355
22	33.6	40.9	35.5	36.9	31.2	41.2	41.1	37.2	1.51846		28.3	33.2	34.5	27.7	31.7	27.7	27.6	30.1	1.11846
24	36.9	42.1	37.6	40.7	34.7	44.2	43.2	39.9143	1.34685		28.1	34.1	34.5	27.8	30.3	30.3	29.2	30.6143	1.0199
26	36.4	41.7	37.8	40.8	35	45.5	42.7	39.9857	1.41311		28.5	35.2	34.9	28.3	31.8	29.3	29.2	31.0286	1.12498
	Female, GAN diet							Avg (g)	SEM		Female, RD							Avg (g)	SEM
0	17	17.3	17.2	16.5	17.1	16.7		16.9667	0.12561		17.6	15.7	15.9	15.3	15.6	15.7		15.9667	0.33632
2	19.4	19.2	22	18.9	17	18.8		19.2167	0.657478		20.2	18.3	17.8	17.5	18.2	17.4		18.2333	0.420053
4	20.7	21	23.7	20.2	18	19.1		20.45	0.791939		21	19.4	18.2	19.1	19.8	18.1		19.2667	0.440959
6	21.9	21.9	25.3	21	19.5	20.6		21.7	0.807878		22.4	20.1	19.4	19.9	20.9	19.1		20.3	0.490578
8	22.6	23.1	26.2	21.3	19.6	20.5		22.2167	0.956179		22.4	21.3	19.7	19.7	21.1	19.6		20.6333	0.468805
10	23	24.8	27.4	21.6	20.7	21.5		23.1667	1.03172		24.5	22.1	20.4	19.5	22.4	19.5		21.4	0.802496
12	23.6	24.7	28.5	21.9	21.8	21.3		23.6333	1.10504		25.5	23.6	19.8	20.8	22.1	20.2		22	0.90074
14	24	26	29.9	23	21.2	22.5		24.4333	1.27506		24.4	22.6	20.4	20.8	22.9	21.1		22.0333	0.625389
16	22.3	25.4	31	22.8	21.7	22.2		24.2333	1.4548		25.7	23.4	21.5	21.4	22.7	20.8		22.5833	0.733674
18	23.4	26.5	31.6	23.9	22.1	22		24.9167	1.49386		25.7	23.2	21.3	21.5	22.9	21.7		22.7167	0.675483
20	22.7	27.1	32	24.6	22.4	21.6		25.0667	1.60368		25	24.7	21.2	21.3	23.4	21.7		22.8833	0.7021
22	22.7	25.6	32.2	23.9	21.5	21		24.4833	1.6867		24.6	23.5	20.9	21.4	23.4	21.4		22.5333	0.610828
24	24.2	29.3	33.8	27		22.5		27.36	1.98711		25.5	25.3	21.6	22.3	24.8	22		23.5833	0.734582
26	24.5	30.1	33.7	27.4		23.5		27.84	1.8659		25.5	25.1	21.8	22.8	24.9	21.6		23.6167	0.717132

## Sheet: Fiure 1F-1G
	Genotype	Diet	%LPA	% CPA
	fl/fl cntrl	Chow	0.017315	0.0157072
	fl/fl cntrl	Chow	0.0113978	0.0199343
	fl/fl cntrl	Chow	0.0260787	0.0159436
	fl/fl cntrl	GAN	0.347057	0.0315926
	fl/fl cntrl	GAN	0.232287	0.021507
	fl/fl cntrl	GAN	0.227343	0.039036
	fl/fl cntrl	GAN	0.285152	0.026733
	fl/fl cntrl	GAN	0.297581	0.0371713
	fl/fl cntrl	GAN	0.307231	0.0385449
	fl/fl cntrl	GAN	0.228782	0.048904
			%steatosis	%collagen area
AVG	fl/fl cntrl	Chow	0.0182638	0.017195
AVG	fl/fl cntrl	GAN	0.275062	0.0347841
SEM	fl/fl cntrl	Chow	0.00426449	0.00137134
SEM	fl/fl cntrl	GAN	0.0176444	0.0034107
		LPA = Lipid Proportionate Area
		CPA = Collagen Proportionate Area

## Sheet: Figure 1H
	RD, fold expression						AVG	SEM
C3ar1	0.4613	1.082	0.7534	0.6087	1.7753	1.3192	0.999983	0.201149
Cfd	0.7289	3.559	0.5433	0.6744	0.4646	0.0299	1.00002	0.521674
Adgre1	0.5333	1.5624	0.8871	0.4172	1.5532	1.0468	1	0.19956
Tnfa	0.8655	1.1209	1.0697	1.1308	0.8064	1.0068	1.00002	0.0554379
Tgfb1	0.6481	1.2755	0.8976	0.6859	1.307	1.1859	1	0.120787
Col1a1	0.8276	0.8881	1.0554	1.21	0.6937	1.3251	0.999983	0.0981363
	GAN, fold expression						AVG	SEM
C3ar1	5.0268	6.2977	3.2516	3.1973	7.7444	5.4684	5.16437	0.720657
Cfd	609.555	84.4189	677.281	302.582	36.5673	282.185	332.098	107.731
Adgre1	3.9057	4.169	3.2084	3.7756	3.5329	6.5013	4.18215	0.482703
Tnfa	4.1111	3.7407	3.4376	5.4782	2.534	2.4552	3.62613	0.457451
Tgfb1	3.8678	4.8535	3.102	3.1761	2.3318	2.6667	3.33298	0.370687
Col1a1	16.251	20.2418	4.0703	2.3782	19.1162	6.5602	11.4363	3.26488

## Sheet: Figure 1 -figure supplement 1BC
Body composition
Fig S2	Percent Lean Mass (%BW)						Percent Fat Mass (%BW)
	Male		Female				Male		Female
	GAN	RD	GAN	RD			GAN	RD	GAN	RD
	65.6	85.6	73.1	75.1			30.7	8.6	21	18.3
	61.7	72.5	65.4	78.4			35.6	23.5	28.6	14.7
	66.3	73.9	53.9	77.9			30.7	21	43.2	15
	59.9	81.4	71.4	81.6			37.2	13.3	22.3	11.9
	72.6	86.1	77.2	74.1			20.1	8.7	17.9	19.6
	56.2	81.7	75.5	78.5			41.6	11.7	18.5	14.5
	58.7	84					39.4	9.5
AVG	63	80.7429	69.4167	77.6		AVG	33.6143	13.7571	25.25	15.6667
SEM	2.10351	2.06454	3.52131	1.09605		SEM	2.73282	2.29967	3.91482	1.14504
Fig S3	Absolute Lean Mass (g)						Absolute Fat Mass (g)
	Male		Female				Male		Female
	GAN	RD	GAN	RD			GAN	RD	GAN	RD
	21.4	24	16.6	18.8			10	2.4	4.8	4.6
	24.2	22.8	17.7	19.4			14	7.4	7.8	3.6
	21.9	24.9	17.3	16.5			10.1	7.1	13.8	3.2
	21.1	22.1	17.6	17.4			13.1	3.6	5.5	2.5
	21.7	25.7	17.3	17.3			6	2.6	4	4.6
	22.2	23.2	16.3	17			16.4	3.3	4	3.2
	23.6	22.9					15.8	2.6
AVG	22.3	23.6571	17.1333	17.7333		AVG	12.2	4.14286	6.65	3.61667
SEM	0.438613	0.482482	0.229008	0.457287		SEM	1.40017	0.818785	1.54094	0.342945

## Sheet: Figure 1 - figure supplement 1D
Female control mice
Fold Expression
	RD fl/fl cntrl						AVG	SEM
C3ar1	1.56	0.395	0.474	1.196	1.121	1.255	1.00017	0.189243
Tnfa	1.45	0.66	0.356	1.122	1.322	1.089	0.999833	0.169246
Adgre1	1.511	0.438	0.477	0.945	1.094	1.535	1	0.195668
Cd68	1.642	0.639	0.563	0.623	1.319	1.214	1	0.184674
Tgfb1	1.441	0.727	0.538	0.787	1.042	1.464	0.999833	0.157574
Acta2	1.832	0.604	0.35	0.706	0.959	1.549	1	0.235305
Col1a1	1.611	0.777	0.585	0.463	1.177	1.387	1	0.188392
Col1a2	1.319	0.731	0.541	0.667	1.378	1.363	0.999833	0.160244
	GAN fl/fl cntrl						AVG	SEM
C3ar1	1.457	1.435	1.937	0.629			1.3645	0.271146
Tnfa	2.847	1.893	2.164	0.439			1.83575	0.506998
Adgre1	1.507	1.654	1.609	0.828			1.3995	0.192966
Cd68	1.311	1.538	1.738	0.999			1.3965	0.15863
Tgfb1	1.515	1.376	1.688	1.288			1.46675	0.0873054
Acta2	1.086	0.851	0.788	0.793			0.8795	0.0703023
Col1a1	2.276	1.1	1.731	1.226			1.58325	0.268156
Col1a2	1.848	1.126	1.635	1.131			1.435	0.182224
