# Supplementary material for: Complement 3a receptor 1 on macrophages and Kupffer cells is not required for the pathogenesis of metabolic dysfunction-associated steatotic liver disease
Source: eLife. 2025 Jan 8;13:RP100708. doi: 10.7554/eLife.100708 (PMC11709426; doi:10.7554/eLife.100708)
Supplement: Figure 2—source data 1. — Source data for Figure 2—figure supplement 1A-D. [file elife-100708-fig2-data1.xlsx]

## Sheet: Figure 2A
Peritoneal F480+/CD11b+ flow-sorted cells
Fold exp.	Fl/fl cntrl						Avg	SEM		C3aR1-MϕKO			Avg	SEM
C3ar1	0.829132	0.3554	0.284885	1.96588	2.11108	0.453628	1	0.337739		0.0274585	0.0168905	0.147285	0.0638781	0.041815
Adgre1	1.19792	0.866004	1.41061	1.59367	0.71411	0.217683	1	0.205907		0.958044	1.17152	1.52113	1.2169	0.164126
Cd68	1.51956	0.988157	1.1283	1.23803	0.863186	0.262765	1	0.173728		1.31169	1.33631	0.787616	1.1452	0.178935

## Sheet: Figure 2B
C3ar1 fold expression
Fl/fl cntrl		C3aR1-MϕKO
Male	Female	Male	Female
0.911889	0.681501	0.0384833	0.042289
2.59653	0.682403	0.0598934	0.0946188
0.536948	1.59892	0.0715176	0.0298753
0.67483	0.657168	0.0545929	0.0477951
0.683368	1.33597	0.0686062	0.0729881
0.840657	0.629456	0.110379	0.0418028
0.785407	1.31628	0.0693232	0.0693327
1.94272	1.22997	0.407971	0.155662
0.443784	1.43503	0.132614	0.0251722
0.920175	0.767017	0.183908	0.0586259
1.06885	0.701237	0.115352	0.0922879
0.594841	0.776705		0.0800738
	1.04804		0.898064
	1.1403		0.0608043
	C3ar1 fold expression
	Fl/fl cntrl		C3aR1-MϕKO
	Male	Female	Male	Female
AVG	1	1	0.119331	0.126385
SEM	0.183028	0.0903684	0.0315329	0.0600192

## Sheet: Figure 2C
Weight Curve
Weeks on diet	Female fl/fl cntrl														Avg (g)	SEM		Female C3ar1-MϕKO														Avg (g)	SEM
0	15.7	16.1	16.8	14.3	15.1	17.3	17.9	16.7	15.1	14.1	14.1	14.4	15.4	13.4	15.6333	0.361729		16	17.6	16	14.6	16.7	16.6	17.9	15.8	15.8	15.6	16.8	16.5	16	15.9	16.3091	0.223466
2	17.9	18.4	19.1	16.6	18.4	21.2	22	19.5	19.2	16.8	17.7	16.9	17.1	16.3	18.6417	0.45701		18.5	19.1	17.9	17.1	18.6	19.6	20.1	21.1	18.8	19.1	18.9	19.5	18.5	17.6	18.9818	0.272928
4	18.8	18.5	20.6	17.6	19.5	20.6	22.8	20.3	19.3	18.4	19.9	18.8	18.7	17.9	19.5917	0.363358		18.1	18.7	18.5	17.7	19.7	20.1	21.1	20.7	18.9	19.6	18.7	19.7	18.3	17.1	19.2545	0.304112
6	20.6	19.4	21.2	18.7	20.4	20.5	23.7	20.3	21.1	20.1	20.2	19.1	19.5	18.7	20.4417	0.341096		20.3	20.8	19.7	18.9	20.1	19.9	22.3	23.3	20	21.3	21.1	21.8	19.4	18.9	20.7	0.344456
9	20.3	19.4	21.1	19	23	21.4	24.5	20.8	20.6	19.3	20.8	20.6	20.5	19.8	20.9	0.391175		19.7	20.2	19.6	18.6	21	21.6	24.1	25.6	21	21.9	20.6	21.2	19.6	19.4	21.2636	0.506601
12	20.6	19.8	24.1	19.5	21.4	23.1	24.9	22.2	22.4	19.6	20.9	20.8	20.4	20	21.6083	0.455065		21.3	21.8	21	20.1	21.6	22.3	24.8	29	24	22.6	22.7	21.4	19.5	19.9	22.8364	0.650263
14	20.9	20	23.3	20	21	21.8	25.5	22.1	22.4	20	21.8	20.9	21.5	21	21.6417	0.395421		20.4	20.8	21.8	20.8	21.2	21.1	24.5	27.2	23.6	23.3	22.8	21.7	20.2	19.4	22.5	0.550496
16	22.3	20.2	23.5	20.5	23.5	22.8	25.8	22.6	22.8	20.7	22.1	21	22.4	21	22.3167	0.401156		21.7	21.9	20.9	20.2	20.5	22.4	24.6	27.8	22.4	23.8	22.9	22.5	20.8	20.2	22.6455	0.549668
18	22.3	21.1	24.1	21.2	22.4	22.5	25.2	23	24.5	21.2	21.7	21.9	21.3	22	22.5917	0.348894		21.4	21.8	21.5	20.3	21.3	23.5	25.5	28.9	23.1	24.6	23.9	23.8	21	20.1	23.2545	0.637859
20	21.7	21.1	25.6	21.6	23.5	24.1	25.8	23.9	23.9	22.1	22.2	22	22.1	21.8	23.125	0.403381		22	24.6	21.9	20.5	21.1	24	26.8	29.3	24.5	25.1	24.1	23.4	21.5	20.8	23.9909	0.666112
22	23	21	25.9	21.4	24.1	24.2	24.9	24.7	24	21.5	22.3	21.8	22.7	21.3	23.2333	0.420846		21.7	25	21.4	21.4	21.5	23.7	24.7	29.5	25	26	24.7	22.8	21.4	20.4	24.0545	0.663975
24	22.2	22	26.5	21.3	24.7	24	27.3	24.2	24.6	22.9	22.3	24.6	23.4	22.1	23.8833	0.468242		22.1	23.4	22.6	21.6	21.2	24	25.7	28.9	24.7	25.3	24.8	23.6	21.8	21	24.0273	0.580089
26	24.1	21.6	28.9	23.6	25.6	24.6	25.1	25	26.2						24.9667	0.661438		23.8	25.7	22.8	23.7	22.7	23.1	25.9	29.8	25.2	25.6	27.7	25.5	22.8	22.5	25.0909	0.571813
30	21.9	21.8	27.3	23.1	24.2	23.2	24.8	23.8	25.5						23.9556	0.583836		22	22.7	21.7	23.8	22.3	23.7	24.5	32.3	24	24.2	28.1	25.5	22.4	22.2	24.4818	0.767522
Weeks of age	Male fl/fl cntrl														Avg (g)	SEM		Male C3ar1-MϕKO														Avg (g)	SEM
0	16.5	18.5	18.1	18.1	19	16.1	20.6	18.1	19.7	15.7	18.1	17.3			17.9833	0.413564		14.6	18.4	18.3	17.2	18.8	20.6	11.3	16.9	15.9	17.4	16.5				16.9	0.736453
2	21.3	21.7	22.9	21.2	22.2	20.8	24.8	22.5	25.1	21	22.1	20.9			22.2083	0.416598		18.2	21.5	20.7	21.4	22.8	23.4	19.2	22.2	20.6	21.4	21.2				21.1455	0.448708
4	22.6	22.8	23.5	25.7	24.1	22	26.9	24.6	28.4	22.9	24.4	23.2			24.2583	0.549719		19.6	22.4	21.2	22.7	24.5	24.2	22.9	25.4	24.1	23.6	24.1				23.1545	0.497514
6	23.5	24.6	25.4	28.7	25.5	24	30	26.7	32.4	25.7	26.2	25.1			26.4833	0.757271		21.8	23.6	22.6	25.1	25.4	26.9	24.9	28.4	26.9	25.4	26.1				25.1909	0.586895
9	24.3	27.1	26.1	31.2	27.5	26.2	32.1	26.8	35.5	29.7	27.1	26.4			28.3333	0.918112		22.3	24	23.1	26.8	27.6	26.9	26.7	31.2	28.7	28.5	28.7				26.7727	0.808488
12	25.8	30.8	26.7	32.5	27.4	28.1	34.1	27.6	37.8	30.7	27.8	26.1			29.6167	1.05879		24.5	25.1	24.2	29.2	29.2	27.4	27.3	32	30	29	29.1				27.9091	0.744367
14	26.2	31.9	26.4	34	28.1	29.7	35.7	27.7	38.7	31.5	28.6	26.8			30.4417	1.15565		24.7	25.6	25	30	31.1	28.7	28.2	33.1	30.3	30	30.6				28.8455	0.820129
16	26.3	32.2	26.9	35.2	29.5	31.9	36.5	27.9	39.2	32	28.6	26.5			31.0583	1.21577		24.7	25.6	25.2	30.7	31.7	29.7	29.1	34.4	30.6	30.2	30.9				29.3455	0.907681
18	27.7	32.9	27.1	36.3	28.1	33.4	36.7	27.5	37.4	31.8	29.4	26.8			31.2583	1.16029		25.5	26.1	24.9	30.5	32.9	29.7	31	37.3	32.7	30.5	31.6				30.2455	1.1035
20	28.3	36.2	30.6	37.1	27.8	34.8	38.6	28.2	37.7	31.5	29.4	26			32.1833	1.28475		25.8	27.6	27.4	34.3	34.4	31.8	30.4	37.3	30.8	29.9	30.1				30.8909	1.02969
22	28.3	36.5	29.2	36.4	36.9	35.6	38.2	27.6	36.1	32.4	29.4	26.5			32.7583	1.24008		25.6	26.8	28	33.4	34.4	30	30.4	37.4	31.1	30.8	31				30.8091	1.02287
24	29.6	37.1	30.4	37.2	27.7	36.1	38.7	28.4	37.1	32.8	29.6	26.7			32.6167	1.26268		25.7	28	28.3	35	34.8	30.5	31.6	38.8	30.2	30.2	30.4				31.2273	1.11739
26	30	39.1	29.2	37.5	28.1	36.4	38.8	28	37.9						33.8889	1.63303		26.6	28.4	30.4	34.6	34.1	30.5									30.7667	1.27767
30	30	39.5	30.6	36.5	27.9	36.1	37.4	27.7	37.3						33.6667	1.52215		26	28.4	29	34.4	33.6	30.8									30.3667	1.31293

## Sheet: Figure 2D
	Percent Lean Mass					Percent Fat Mass
	Male		Female			Male		Female
	Fl/fl cntrl	C3ar1-MϕKO	Fl/fl cntrl	C3ar1-MϕKO		Fl/fl cntrl	C3ar1-MϕKO	Fl/fl cntrl	C3ar1-MϕKO
AVG	69.7667	71.95	70.9333	72.1357		25.8	23.0667	22.9	21.9714
SEM	2.78767	3.89818	1.14078	1.30517		3.11738	4.25885	1.37305	1.52925
	76.6	85.6	75.6	77.1		16.8	8	17.4	16.3
	54.8	77.5	75.2	73.7		41.8	16.1	16.2	19.9
	73.3	68	64.7	76.5		21.8	26.2	29.2	16.1
	64.4	58.8	72.9	71.2		31.8	37.1	21.6	25
	74.4	66	69	77.4		19.3	30.5	25.1	16.9
	64.7	75.8	72	68.9		31.9	20.5	22.4	24.5
	68.1		70.4	71.1		28.6		23.1	21.9
	83.7		68.8	61.2		11.2		25.7	35.2
	67.9		69.8	68.3		29		25.4	26
				72.7					20.2
				65.8					29.8
				72.1					22.5
				78.1					16
				75.8					17.3

## Sheet: Figure 2E
Glucose Tolerance Test
Min post glucose injection	Female fl/fl cntrl									Avg (g)	SEM		Female C3ar1-MϕKO														Avg (g)	SEM
0	83	94	85	79	74	88	88	80	72	82.5556	2.35768		83	79	97	70	81	74	92	106	80	86	73	68	79	77	83.7273	2.82294
20	419	422	416	405	493	420	397	425	372	418.778	10.8138		342	475	504	484	381	449	388	371	345	394	459	356	382	351	417.455	15.0717
40	318	209	313	289	363	324	280	197	264	284.111	18.0558		288	324	371	315	258	307	231	325	320	287	288	228	199	262	301.273	12.3935
60	259	207	233	189	310	274	224	178	244	235.333	13.9821		209	250	267	260	200	251	231	268	265	227	241	179	162	191	242.636	9.36771
90	214	180	208	165	200	218	178	187	188	193.111	5.98481		156	202	197	182	152	197	173	221	210	163	167	162	137	178	183.636	6.48465
120	184	161	139	147	174	189	136	148	142	157.778	6.69116		132	169	161	155	134	149	160	183	166	116	125	138	148	160	150	5.00596
Min post glucose injection	Male fl/fl cntrl									Avg (g)	SEM		Male C3ar1-MϕKO														Avg (g)	SEM
0	113	103	118	113	89	110	97	107	103	105.889	2.99743		81	125	106	111	94	90									101.167	6.50854
15	512	455	452	502	441	474	489	375	447	460.778	13.6135		498	390	369	429	453	348									414.5	22.9183
30	586	529	503	581	503	568	531	510	556	540.778	10.9744		489	488	525	586	481	544									518.833	16.7877
60	499	514	404	555	414	567	444	414	479	476.667	20.5467		421	386	372	493	480	360									418.667	23.0791
90	370	496	316	478	277	454	359	233	304	365.222	31.0021		211	292	316	454	390	262									320.833	36.0078
120	238	333	225	332	203	287	264	158	213	250.333	19.716		158	240	246	335	315	176									245	29.0723
180	140	178	153	171	149	146	159	110	117	147	7.49074		110	159	139	167	159	131									144.167	8.81066

## Sheet: Figure 2F
	Percent Liver Mass
	Male		Female
	Fl/fl cntrl	C3ar1-MϕKO	Fl/fl cntrl	C3ar1-MϕKO
AVG	4.72111	4.28	4.72556	5.17286
SEM	0.221538	0.231373	0.0916684	0.276048
	4.13	3.79	4.96	5.34
	6.06	3.83	4.26	4.6
	4.46	3.7	4.71	5.07
	4.39	4.71	4.61	4.58
	4.07	4.98	4.95	5.06
	4.84	4.67	5.04	4.82
	4.7		4.98	6.32
	5.51		4.43	4.78
	4.33		4.59	4
				5.04
				5.01
				4.45
				8.27
				5.08

## Sheet: Figure 2H-2I
	Genotype	%LPA	% CPA
	Fl/fl cntrl	0.0190554	0.0374323
	Fl/fl cntrl	0.294752	0.0172073
	Fl/fl cntrl	0.0321982	0.0220274
	Fl/fl cntrl	0.171794	0.0137694
	Fl/fl cntrl	0.0389831	0.0192955
	Fl/fl cntrl	0.129551	0.0258707
	Fl/fl cntrl	0.157016	0.0302342
	C3ar1-MjKO	0.00699929	0.0460879
	C3ar1-MjKO	0.0301661	0.0357515
	C3ar1-MjKO	0.0513452	0.016331
	C3ar1-MjKO	0.153693	0.00883287
	C3ar1-MjKO	0.187393	0.0169866
	C3ar1-MjKO	0.0717372	0.0407778
		%steatosis	%collagen area
AVG	Fl/fl cntrl	0.120479	0.023691
AVG	C3ar1-MjKO	0.0835557	0.0274613
SEM	Fl/fl cntrl	0.0375257	0.00308202
SEM	C3ar1-MjKO	0.0292061	0.00625467
		LPA = Lipid Proportionate Area
		CPA = Collagen Proportionate Area

## Sheet: Figure 2J
Fold expression	Fl/fl cntrl												Avg	SEM
Adgre1	1.42	1.494	0.747	0.909	0.739	0.771	0.546	0.767	0.567	1.158	2.201	0.682	1.00008	0.141144
Ccr2	0.235	3.544	0.448	0.86	0.45	0.545	0.485	3.174	0.186	1.09	0.555	0.429	1.00008	0.326567
Il1b	1.351	0.974	0.967	0.79	0.762	1.312	0.277	1.014	0.768	0.856	1.306	1.623	1	0.10307
Tnfa	0.565	2.041	0.731	1.188	0.571	0.641	0.717	1.168	0.519	1.068	1.638	1.153	1	0.136745
Cd163	0.853	0.75	0.907	0.85	0.778	1.636	0.952	0.544	0.928	1.874	0.48	1.447	0.999917	0.123661
Tlr4	0.714	1.907	1.041	1.054	0.781	0.914	0.931	1.397	0.67	0.843	1.001	0.749	1.00017	0.100126
Trem2	0.15	3.808	0.298	0.448	0.298	1.179	1.081	3.486	0.295	0.428	0.279	0.251	1.00008	0.369495
Col1a1	0.291	4.118	0.24	0.258	0.221	1.988	0.812	2.735	0.161	0.345	0.575	0.255	0.999917	0.367732
Col1a2	0.412	3.208	0.388	0.488	0.419	1.324	0.992	2.542	0.401	0.567	0.809	0.45	1	0.269164
Col3a1	0.385	3.878	0.426	0.367	0.307	1.639	0.926	2.35	0.203	0.486	0.622	0.412	1.00008	0.319752
Acta2	0.933	1.771	0.725	0.567	0.769	1.27	0.81	1.505	0.717	0.984	0.755	1.194	1	0.105077
Tgfb	0.92	1.723	0.868	0.933	0.792	1.064	0.843	1.359	0.642	0.944	1.146	0.765	0.999917	0.0852702
Fgf21	1.091	2.66	0.539	0.235	0.304	0.332	0.454	0.595	0.782	1.279	2.07	1.659	1	0.224603
Acc2	0.937	1.845	0.707	0.744	0.773	0.94	0.964	1.397	0.588	1.209	1.086	0.811	1.00008	0.100753
Pepck1	1.173	0.689	1.052	0.489	1.163	0.994	0.606	0.656	0.935	1.086	1.473	1.685	1.00008	0.10281
Fasn	0.605	2.459	0.639	0.854	0.666	1.045	0.837	1.243	0.555	1.33	1.004	0.762	0.999917	0.150734
Scd1	0.465	2.753	0.425	0.798	0.608	1.136	0.642	0.775	0.184	1.771	1.659	0.784	1	0.21003
Srebp1c	0.559	1.322	0.973	1.377	1.679	1.136	1.495	1.413	0.585	0.561	0.559	0.34	0.999917	0.132893
Fold expression	C3aR1-MϕKO											Avg	SEM
Adgre1	0.837	0.408	0.703	0.806	1.978	0.71	0.689	1.391	1.524	1.018	0.96	1.00218	0.137163
Ccr2	0.157	0.12	0.376	0.353	0.256	0.789	0.517	1.208	1.631	0.695	0.544	0.604182	0.139589
Il1b	0.75	0.381	0.523	0.782	1.945	0.381	0.854	1.371	1.974	0.876	1.664	1.04555	0.179342
Tnfa	0.42	0.33	0.596	0.704	1.207	0.785	0.661	1.582	1.902	1.372	1.503	1.00564	0.159074
Cd163	2.67	1.063	2.331	1.737	1.056	0.447	1.081	0.482	1.781	0.706	0.737	1.281	0.225397
Tlr4	0.671	0.55	1.005	0.893	0.751	0.882	0.825	0.944	1.227	0.928	0.953	0.875364	0.0539315
Trem2	0.335	0.232	0.44	0.293	0.302	0.547	0.355	1.445	0.506	0.573	0.374	0.491091	0.100965
Col1a1	0.12	0.237	0.227	0.309	0.202	0.581	0.318	1.141	0.51	0.701	0.329	0.425	0.0890258
Col1a2	0.251	0.423	0.479	0.522	0.387	0.845	0.526	1.354	0.83	0.831	0.454	0.627455	0.0940274
Col3a1	0.216	0.361	0.38	0.435	0.292	0.656	0.416	1.441	0.58	0.713	0.486	0.543273	0.100458
Acta2	0.382	1.232	1.126	0.67	1.256	0.954	1.197	1.728	0.927	1.193	1.046	1.06464	0.10426
Tgfb	0.564	0.723	0.828	0.947	1.253	0.859	0.802	1.405	1.451	0.914	1.032	0.979818	0.0849426
Fgf21	1.028	1.115	0.461	0.304	0.206	0.607	2.06	1.782	1.819	1.444	0.833	1.05991	0.194592
Acc2	0.567	0.791	1.101	1.024	0.939	0.584	0.957	1.223	1.187	1.036	0.865	0.934	0.0658425
Pepck1	1.361	1.4	1.623	1.192	0.792	1.239	1.129	0.573	1.23	0.979	1.133	1.15009	0.0872769
Fasn	0.478	0.615	1.13	1.126	1.105	0.547	1.019	2.06	1.049	1.08	0.861	1.00636	0.128677
Scd1	0.538	0.614	1.604	1.565	0.898	0.294	1.111	2.012	1.221	1.135	1.063	1.09591	0.152603
Srebp1c	0.251	0.515	1.221	0.974	1.618	1.037	0.676	0.558	0.478	0.357	0.697	0.762	0.123731

## Sheet: Figure 2K
	Fl/fl cntrl			Avg	SEM		C3ar1-MϕKO					Avg	SEM
C3ar1	1.524	0.82	0.657	1.00033	0.266028		0.219	0.465	0.037	0.437	0.329	0.2974	0.0782723
Tnfa	1.351	1.051	0.597	0.999667	0.219169		2.847	0.809	0.625	1.003	4.064	1.8696	0.678071
Adgre1	1.184	0.826	0.989	0.999667	0.103483		1.929	1.488	1.584	0.926	1.012	1.3878	0.186536
Cd68	1.517	0.55	0.934	1.00033	0.281112		1.131	0.804	0.99	0.59	0.72	0.847	0.0962112
Tgfb1	1.288	0.632	1.079	0.999667	0.193481		1.744	0.925	1.571	0.735	0.702	1.1354	0.218239
Acta2	0.988	1.055	0.957	1	0.0289194		2.034	0.91	1.419	0.823	1.316	1.3004	0.215963
Col1a1	1.126	0.934	0.941	1.00033	0.0628658		3.767	1.073	2.181	1.254	2.36	2.127	0.480617
Col1a2	1.242	0.81	0.948	1	0.127389		2.172	0.971	1.434	1.126	1.777	1.496	0.218209
Col3a1	1.205	0.87	0.925	1	0.103722		2.785	0.805	2.104	1.028	1.102	1.5648	0.378104

## Sheet: Figure 2 - figure supplement 1A
Insulin Tolerance Test, 29 weeks diet
Minutes post i.p. glucose	Fl/fl cntrl									AVG	SEM
0	198	228	208	226	228	207	214	219	165	210.333	6.64789
15	181	153	143	175	153	184	151	160	119	157.667	6.81298
30	124	142	124	151	113	159	128	124	111	130.667	5.50757
60	85	145	80	133	73	143	97	77	97	103.333	9.69249
90	83	130	67	116	73	158	96	72	78	97	10.4283
120	86	147	98	140	106	161	94	89	95	112.889	9.46697
	C3ar1-MϕKO									AVG	SEM
0	165	161	174	197	244	206				191.167	12.8255
15	146	129	147	152	194	130				149.667	9.67011
30	79	107	186	146	141	115				129	15.1239
60	58	72	81	118	99	94				87	8.67179
90	73	67	94	113	88	92				87.8333	6.69037
120	89	97	101	131	117	112				107.833	6.20976

[truncated: 3 more sheets: Figure 2 - figure supplement 1B, Figure 2 - figure supplement 1C, Figure 2 - figure supplement 1D]
