# Supplementary material for: Complement 3a receptor 1 on macrophages and Kupffer cells is not required for the pathogenesis of metabolic dysfunction-associated steatotic liver disease
Source: eLife. 2025 Jan 8;13:RP100708. doi: 10.7554/eLife.100708 (PMC11709426; doi:10.7554/eLife.100708)
Supplement: Figure 3—source data 1. — Source data for Figure 3—figure supplement 1A. [file elife-100708-fig3-data1.xlsx]

## Sheet: Figure 3A
Weeks on diet	Male fl/fl cntrl									AVG	SEM		Weeks post diet	Female fl/fl cntrl										AVG	SEM
0	17	17.9	18.3	17.3	17.8	16.4	14.6	17.2	15.7	16.9111	0.391026		0	15.7	16.1	14.8	15.6	13.8	15.2	16.2	15	15.5	16.8	15.47	0.264596
3	23.1	22.6	22.8	22.1	24.6	22.7	20.9	24.2	21.4	22.7111	0.396668		3	18.9	20	18	18.7	18.8	18.4	20.2	18.8	18.7	20.2	19.07	0.246329
6	26	25.5	25.9	24.8	28.4	25.6	23.7	25.3	23.7	25.4333	0.468449		6	19.9	22.5	19.6	20.5	21.1	19.4	21.1	21.3	19.1	23	20.75	0.412647
9	29.1	26.7	27.5	27.6	30.3	29	27.8	30.5	30.3	28.7556	0.472026		9	22.3	23.7	20.4	21.6	21.4	20.9	21.9	22.5	20.4	25.2	22.03	0.475172
12	31.2	31.1	29.3	30.6	30.1	31.6	29.8	34.1	32.3	31.1222	0.484131		12	20.8	24	20.1	20.9	22.8	21.2	22.7	24.7	21.6	27.9	22.67	0.743871
14	30.6	31.9	28.5	30.3	29.5	31.8	31.3	34.8	32.1	31.2	0.600694		14	21.8	24.3	21.7	21.6	23.4	21.7	22.8	25	21.7	28.2	23.22	0.674257
16	30.8	31.9	29	31.4	30.4	33.2	33.1	29	30	30.9778	0.521956		16	21	24.8	24	21.1	24.6	21.1	24.1	25.7	21.6	29.7	23.77	0.865647
18	31.2	32.6	30.3	32.8	31.2	33.6	35	29.2	29.8	31.7444	0.632699		18	23.6	25.7	22.2	21.2	25.2	23.3	23.4	25.1	22.9	30.1	24.27	0.784014
21	32.5	34.3	31.5	34.2	33.1	35.1	36.6	28.5	32	33.0889	0.783412		21	23	27.2	22.8	22.6	26.5	24.6	25	26.3	21.9	30.3	25.02	0.824864
24	33.2	35.1	33.1	35.2	35.6	37.2	38.5	30.7	31.8	34.4889	0.839385		24	23.5	29	25.6	23.7	26.9	24.3	26.6	28	23.2	30.7	26.15	0.805985
26	33.5	36.5	33.8	35.9	35.5	37.6	39.2	30.6	33.2	35.0889	0.865455		26	23.1	29.5	23.4	22.2	27.5	22.9	25.2	28.6	22.7	32.3	25.74	1.11068
28	33.5	34.8	32.8	33.4	36.1	36.8	41	34	41	35.9333	1.04947
	Male C3aR1-KpKO									AVG	SEM			Female C3aR1-KpKO										AVG	SEM
0	18.4	18.2	17.2	16.7	17.1	17.4	15.6	18.2		17.35	0.330584		0	16.2	14.8	16	17.4	16	16	15.9	15.6	15.1	16.1	15.91	0.219823
3	23	22.5	22.3	23	24.6	22.7	22.2	22.6		22.8625	0.268553		3	19.9	18	18.5	22	20.6	19.1	18	16.5	18.6	19.3	19.05	0.484252
6	26.2	24.9	23	26.5	29.1	24	26.3	27.6		25.95	0.691014		6	21.8	18.6	19.9	23.3	22.4	20.4	19.9	17.5	19.1	21.6	20.45	0.57373
9	27.4	26.3	26.6	28.1	32.3	26.6	27.2	26.6		27.6375	0.697172		9	23.2	20.4	20.4	24.3	23.7	23	20.4	18.2	21	24.1	21.87	0.649624
12	31.1	29.3	30.5	26.6	34.9	27.1	28.5	28.4		29.55	0.936559		12	25.7	20.2	20.6	25.6	24.5	21.9	20.3	19.6	22.1	26.6	22.71	0.835923
14	30.7	29.2	30.9	30.8	33.8	27.2	29.6	28.5		30.0875	0.697044		14	23.6	20.3	22	24.6	24.5	23.5	20.8	19.2	22.2	27.6	22.83	0.778182
16	31.4	29	31	30.6	34.3	27.5	36.6	31		31.425	1.0122		16	23.5	20.2	20.4	24.9	25.4	22.6	21	19	22.9	26.9	22.68	0.806749
18	33	29	31.6	32.8	34.1	27.9	37.9	33.4		32.4625	1.09446		18	24.7	21.9	21.8	24.6	27.3	21.8	20.8	20.6	24.8	29.2	23.75	0.910952
21	34.5	29.3	32.9	34.5	34.8	28.2	40	36.2		33.8	1.32692		21	26.8	21.6	23.1	26.9	30	25.1	21.9	21.9	25.5	30	25.28	1.00397
24	35.8	29.7	34.3	36.8	39	29.5	39.6	37.5		35.275	1.37266		24	26.5	23	24.5	27.7	31.5	24.5	23.1	20.6	26.5	30.5	25.84	1.0786
26	33.4	30.2	34.7	36.9	39	30.7	41.9	38.8		35.7	1.47551		26	26.3	23.5	23.3	25.6	31.9	24.8	22.5	20.4	26.6	32.1	25.7	1.20333
28	34.2	29.6	34.6	35.8	38.3	32	45	35		35.5625	1.62546

## Sheet: Figure 3B
	Male fl/fl cntrl										AVG	SEM
Lean mass	67.8	64.2	62.4	64.9	65.7	59.6	60.1	72.2	64.2		64.5667	1.28938
Fat mass	27.8	32.2	33.3	31.5	30.3	38	36.6	22.6	31.5		31.5333	1.51987
	Male C3ar1-KpKO
Lean mass	63.3	68.7	62.8	66.9	67.5	72.5	57	61.8			65.0625	1.69947
Fat mass	33.8	27.1	33.8	29.6	29.7	21.8	40.5	34.8			31.3875	1.99405
	Female fl/fl cntrl
Lean mass	80	61.3	66.8	73.2	64.9	75.3	73.3	63.7	78.4	62.2	69.91	2.19132
Fat mass	13.5	34.3	28.1	20	30.2	19	22.6	32.3	16.1	33.8	24.99	2.43148
	Female C3ar1-KpKO
Lean mass	70.8	73.6	76.6	70	60.3	79.4	77.3	80.1	69.2	60.3	71.76	2.25749
Fat mass	23.3	20.5	17.8	24.8	35.5	15.3	16.1	13.6	26.4	36.3	22.96	2.53106

## Sheet: Figure 3C
Glucose Tolerance Test
Min post i.p. glucose	Male fl/fl cntrl										AVG	SEM		Male C3aR1-KpKO										AVG	SEM
0	77	94	87	99	95	104	112	127	116		101.222	5.12558		90	69	90	93	84	94	75				85	3.62531
20	475	423	491	388	477	432	510	486	410		454.667	14.0594		464	481	460	485	394	409	442				447.857	13.2115
40	525	512	539	498	470	491	504	413	454		489.556	12.9068		481	508	498	528	379	481	499				482	18.2235
60	478	506	530	403	464	495	530	436	455		477.444	14.2362		529	517	478	473	327	442	485				464.429	25.3564
90	429	421	448	323	387	447	538	349	374		412.889	21.3173		411	336	372	400	269	404	400				370.286	19.5164
120	354	415	324	254	310	430	401	312	336		348.444	19.1312		309	272	318	308	197	311	329				292	17.1659
180	204	314	213	171	187	333	205	167	169		218.111	20.7508		179	181	192	160	164	177	187				177.143	4.37214
	Female fl/fl cntrl										AVG	SEM		Female C3aR1-KpKO										AVG	SEM
0	69	73	77	61	93	98	80	82	83	88	80.4	3.50935		95	90	80	67	96	82	51	74	87	78	80	4.32563
20	476	368	281	356	405	417	466	477	438	397	408.1	19.52		434	498	469	390	383	406	375	387	390	359	409.1	14.021
40	416	369	335	348	429	332	323	452	348	341	369.3	14.5312		362	434	405	357	394	462	284	320	364	374	375.6	16.4075
60	296	273	254	331	416	267	236	364	335	312	308.4	17.3917		272	400	305	299	315	456	252	210	256	396	316.1	24.5707
90	216	179	200	182	315	220	182	270	185	231	218	14.0697		192	295	174	220	250	335	173	178	196	349	236.2	21.3998
120	199	140	147	143	271	174	123	249	170	195	181.1	15.2967		179	230	146	163	216	218	150	124	187	224	183.7	11.8181

## Sheet: Figure 3D
Liver Mass (g)
	Fl/fl cntrl										AVG	SEM
Male		1.565	1.391	1.344	1.638	2.306	2.1	1.237	1.906		1.68588	0.135405
Female	1.122	1.375	1.104	1.098	1.283	0.987	1.159	1.095	1.086	1.274	1.1583	0.0368746
	C3aR1-KpKO										AVG	SEM
Male	1.478	1.067	1.561	1.56	2.317	1.173	3.173	1.429			1.71975	0.245944
Female	1.262	1.113	0.917	1.26	1.434	1.285	2.044	0.873	1.085	1.33	1.2603	0.103822

## Sheet: Figure 3F-3G
	%Lipid Droplet Area (%LPA)			%Collagen area (%CPA)
	fl/fl cntrl	C3aR1-KpKO		fl/fl cntrl	C3aR1-KpKO
AVG	21.5667	19.8163		3.10333	2.325
SEM	2.39132	3.35719		0.339252	0.249098
	12.06	22.82		1.85	2.24
	24.93	12.41		3.6	3.05
	18.91	19.74		1.96	1.91
	17.13	19.99		3.52	0.81
	19.22	26.01		2.79	2.59
	30.27	6.59		4.13	2.48
	33.18	37.52		3.04	2.73
	13.91	13.45		2.2	2.79
	24.49			4.84

## Sheet: Figure 3H
Fold Expression
	fl/fl cntrl						AVG	SEM		C3aR1-KpKO						AVG	SEM
C3ar1	0.781	0.762	1.01	1.133	0.685	1.629	1	0.143441		0.133	0.274	0.111	0.09	0.747		0.271	0.123286
Adgre1	0.664	0.651	1.3	0.965	1.272	1.148	1	0.118576		0.815	0.992	1.048	1.093	1.048		0.9992	0.0487559
CD68	0.541	0.72	0.815	1.141	0.988	1.796	1.00017	0.180457		0.854	0.823	0.895	1.022	1.799		1.0786	0.183257
Tnfa	1.414	0.843	1.126	1.751	0.392	0.474	1	0.217735		0.934	1.343	0.783	0.891	0.549		0.9	0.129301
Ccr2	0.659	0.904	1.04	1.794	0.507	1.096	1	0.183466		0.546	0.971	0.782	0.56	2.413		1.0544	0.348558
HNF1a	0.968	0.869	0.972	1.055	1.244	0.892	1	0.0557357		1.298	0.953	0.966	1.01	1.111		1.0676	0.0639301
Il1b	1.054	0.742	0.583	1.629	1.111	0.882	1.00017	0.148913		0.843	1.134	1.381	1.184	0.902		1.0888	0.0979282
Il6	2.047	0.702	1.538	1.446	0.15	0.117	1	0.325349		0.414	1.425	1.009	0.188	0.081		0.6234	0.256795
Tlr4	0.704	0.992	0.867	1.087	0.834	1.518	1.00033	0.116736		0.899	1.239	1.244	1.055	1.213		1.13	0.0673617
Cd163	0.695	0.911	1.251	1.11	1.18	0.853	1	0.0875702		1.345	0.785	1.257	1.89	0.545		1.1644	0.234018
Trem2	0.189	0.653	0.372	0.958	0.627	3.202	1.00017	0.453219		0.348	0.484	0.462	0.673	3.584		1.1102	0.620648
Col1a1	0.27	0.754	0.38	0.721	0.42	3.454	0.999833	0.497131		0.541	0.616	0.473	0.386	3.659		1.135	0.63214
Col1a2	0.454	0.721	0.701	0.792	0.709	2.623	1	0.327996		0.61	0.826	0.562	0.655	2.378		1.0062	0.345828
Col3a1	0.41	0.572	0.546	0.786	0.695	2.99	0.999833	0.401511		0.733	0.75	0.782	0.697	3.11		1.2144	0.474098
Acta2	0.897	1.264	1.033	0.8	0.857	1.149	1	0.0739468		1.068	0.737	0.92	1.015	2.372		1.2224	0.292873
Tgfb1	0.689	0.711	0.87	0.711	1.498	1.522	1.00017	0.163417		0.942	1.004	0.883	1.207	1.459		1.099	0.10526
Fgf21	0.484	1.124	0.763	0.7	0.852	2.079	1.00033	0.231944		0.753	0.589	0.454	0.806	2.011		0.9226	0.279092
Acc1	0.863	0.915	0.895	0.907	0.958	1.462	1	0.0932516		1.612	0.919	0.875	0.645	1.206		1.0514	0.16613
Pepck1	0.574	0.796	0.998	1.246	1.103	1.284	1.00017	0.111785		0.601	0.874	0.985	1.449	1.218		1.0254	0.145121
Scd1	0.385	0.929	1.04	0.795	1.215	1.635	0.999833	0.170913		1.258	0.543	0.98	0.927	1.133		0.9682	0.121197
Fasn	0.714	1.07	0.741	0.743	0.849	1.882	0.999833	0.184441		1.375	0.762	0.761	0.666	0.901		0.893	0.126195
Srebp1c	1.103	0.955	0.824	0.891	1.06	1.166	0.999833	0.0537422		1.807	0.852	1.036	0.881	0.863		1.0878	0.182871

## Sheet: Figure 3 - figure supplement 1A
Female, regular diet
	Fold C3ar1 expression
	fl/fl cntrl	C3aR1-KpKO
	0.866	0.068
	1.134	0.186
		0.077
AVG	1	0.110333
SEM	0.134	0.0379224
