# Supplementary material for: Complement 3a receptor 1 on macrophages and Kupffer cells is not required for the pathogenesis of metabolic dysfunction-associated steatotic liver disease
Source: eLife. 2025 Jan 8;13:RP100708. doi: 10.7554/eLife.100708 (PMC11709426; doi:10.7554/eLife.100708)
Supplement: Supplementary file 1. [file elife-100708-supp1.xlsx]

## Sheet: Sheet1
Mus musculus gene name	Forward qPCR primer	Reverse qPCR primer
Acc2	GCCTCCACTCACATTGGTTT	ATTGAAGAAAGCTGGGCTGA
Acta2	GGCTCTGGGCTCTGTAAGG	CTCTTGCTCTGGGCTTCATC
Adgre1	TGCATCTAGCAATGGACAGC	GCCTTCTGGATCCATTTGAA
C3ar1	TGACAGGTCAGCTCCTTCCT	CATTAGGAGGCTTTCCACCA
Ccr2	ATCCACGGCATACTATCAACATC	CAAGGCTCACCATCATCGTAG
Cd163	TCCACACGTCCAGAACAGTC	CCTTGGAAACAGAGACAGGC
Cfd	CGTACCATGACGGGGTAGTC	ATCCGGTAGGATGACACTCG
Col1a1	GTGCTCCTGGTATTGCTGGT	GGCTCCTCGTTTTCCTTCTT
Col1a2	GCCACCATTGATAGTCTCTCC	CACCCCAGCGAAGAACTCATA
Col3a1	GGGTTTCCCTGGTCCTAAAG	CCTGGTTTCCCATTTTCTCC
Fasn	TTGCTGGCACTACAGAATGC	AACAGCCTCAGAGCGACAAT
Fgf21	CTGCTGGGGGTCTACCAAG	CTGCGCCTACCACTGTTCC
Hnf1a	GACCTGACCGAGTTGCCTAAT	CCGGCTCTTTCAGAATGGGT
Il1b	CTGGTGTGTGACGTTCCCATTA	CCGACAGCACGAGGCTTT
Il6	ACAACCACGGCCTTCCCTACTT	CACGATTTCCCAGAGAACATGTG
Pepck1	TCATCATCACCCAAGAGCAG	CACATAGGGCGAGTCTGTCA
Rps18	CATGCAGAACCCACGACAGTA	CCTCACGCAGCTTGTTGTCTA
Scd1	CGCCCAAGCTGGAGTACGTC	CGCCCAAGCTGGAGTACGTC
Srebp1c	CTGGCAGTTCCATTGACAAG	ACTGAAGCTGGTGACTGCTG
Tgfb1	TGCGCTTGCAGAGATTAAAA	AGCCCTGTATTCCGTCTCCT
Tlr4	TGTCATCAGGGACTTTGCTG	GGACTCTGATCATGGCACTG
Tnfa	ACGGCATGGATCTCAAAGAC	AGATAGCAAATCGGCTGACG
Trem2	CTACCAGTGTCAGAGTCTCCGA	CCTCGAAACTCGATGACTCCTC

## Sheet: Sheet2
Homan et al. 2024. Supplementary File 1.
Mus musculus gene name	Forward qPCR primer sequence	Reverse qPCR primer sequence
Acc2	GCCTCCACTCACATTGGTTT	ATTGAAGAAAGCTGGGCTGA
Acta2	GGCTCTGGGCTCTGTAAGG	CTCTTGCTCTGGGCTTCATC
Adgre1	TGCATCTAGCAATGGACAGC	GCCTTCTGGATCCATTTGAA
C3ar1	TGACAGGTCAGCTCCTTCCT	CATTAGGAGGCTTTCCACCA
Ccr2	ATCCACGGCATACTATCAACATC	CAAGGCTCACCATCATCGTAG
Cd163	TCCACACGTCCAGAACAGTC	CCTTGGAAACAGAGACAGGC
Cfd	CGTACCATGACGGGGTAGTC	ATCCGGTAGGATGACACTCG
Col1a1	GTGCTCCTGGTATTGCTGGT	GGCTCCTCGTTTTCCTTCTT
Col1a2	GCCACCATTGATAGTCTCTCC	CACCCCAGCGAAGAACTCATA
Col3a1	GGGTTTCCCTGGTCCTAAAG	CCTGGTTTCCCATTTTCTCC
Fasn	TTGCTGGCACTACAGAATGC	AACAGCCTCAGAGCGACAAT
Fgf21	CTGCTGGGGGTCTACCAAG	CTGCGCCTACCACTGTTCC
Hnf1a	GACCTGACCGAGTTGCCTAAT	CCGGCTCTTTCAGAATGGGT
Il1b	CTGGTGTGTGACGTTCCCATTA	CCGACAGCACGAGGCTTT
Il6	ACAACCACGGCCTTCCCTACTT	CACGATTTCCCAGAGAACATGTG
Pepck1	TCATCATCACCCAAGAGCAG	CACATAGGGCGAGTCTGTCA
Rps18	CATGCAGAACCCACGACAGTA	CCTCACGCAGCTTGTTGTCTA
Scd1	CGCCCAAGCTGGAGTACGTC	CGCCCAAGCTGGAGTACGTC
Srebp1c	CTGGCAGTTCCATTGACAAG	ACTGAAGCTGGTGACTGCTG
Tgfb1	TGCGCTTGCAGAGATTAAAA	AGCCCTGTATTCCGTCTCCT
Tlr4	TGTCATCAGGGACTTTGCTG	GGACTCTGATCATGGCACTG
Tnfa	ACGGCATGGATCTCAAAGAC	AGATAGCAAATCGGCTGACG
Trem2	CTACCAGTGTCAGAGTCTCCGA	CCTCGAAACTCGATGACTCCTC
